# Supplementary material for: Efficiency of the knowledge triangle policy in the EU member states: DEA approach
Source: Springer Nature journal article supplement (doi:10.1186/s40604-015-0028-z), 2015-11-24
Supplement: MOESM1 [file 11901872]

## Efficiency of the Knowledge Triangle Policy in the EU Members States: DEA Approach

Katarzyna Tarnawska & Vasileios Mavroeidis.

فاعلية سياسة مثلث المعرفة فى الدول الاعضاء فى الاتحاد الاوروبى: نظرية التحليل المظروف للبيانات (DEA)

الكاتب (ة) : Katarzyna Tarnawska & Vasileios Mavroeidis

### ملخص

تهدف هذه الورقة الى مقارنة الفاعلية النسبية لسياسة مثلث المعرفة فى 25 دولة عضو فى الاتحاد الاوروبى والى تقديم ادلة على الفاعلية التقنية لمثلث المعرفة والى تم احتسابها على اساس نموذج التحليل المظروف للبيانات (DEA) المرتكز على الانتاج والذى يفترض ان المتغير هو عوائد الحجم (VRS). كما وقع احتساب مؤشرات فاعلية مثلث المعرفة باستخدام مفهوم المدخلات الحالية والمحتملة تظهر النتائج المتحصل عليها عبر مخرجات النموذج المستعمل انه يمكن الجزم عموما بفاعلية سياسة مثلث المعرفة المتبعة فى الاتحاد الاوروبى إلا ان التحليل التفصيلى لمؤشرات فاعلية مثلث المعرفة يكشف المزيد من الفوارق فى هذا المجال بين البلدان المعنية. كما انه وقع الكشف على فوارق بين وحدات صنع القرار (DMUs) عن طريق تحليل المرجعيات المشتركة. توحى نتائج هذا البحث بضرورة تعديل او تعزيز سياسة مثلث المعرفة فى بعض الدول الاعضاء. ولكن ينبغى ان ينظر الى هذه النتائج بحذر لأنها تتأثر باختيار المتغيرات.
